# Supplementary material for: A New Approach to Compute the Porosity and Surface Roughness of Porous Coated Capillary-Assisted Low Pressure Evaporators
Source: Springer Nature journal article supplement (doi:10.1038/s41598-018-30090-9), 2018-07-30
Supplement: MOESM1 [file 41598_2018_30090_moesm1_esm.pdf]

# A New Approach to Compute the Porosity and Surface Roughness of Porous Coated Capillary-Assisted Low Pressure Evaporators

Poovanna Cheppudira Thimmaiah<sup>1</sup>, Asish Kumar Panda<sup>2</sup>, Upendra Kumar Pandey<sup>3</sup>, Claire McCague<sup>1</sup>, Pradip Dutta<sup>3\*</sup> and Majid Bahrami<sup>1</sup>

<sup>1</sup>Laboratory for Alternative Energy Conversion (LAEC), School of Mechatronic Systems Engineering, Simon Fraser University, BC, Canada V3T 0A3

<sup>2</sup>Materials Research Centre (MRC), Indian Institute of Science (IISc), Bangalore, India 560012

<sup>3</sup>Interdisciplinary Centre for Energy Research (ICER), Indian Institute of Science (IISc), Bangalore, India 560012

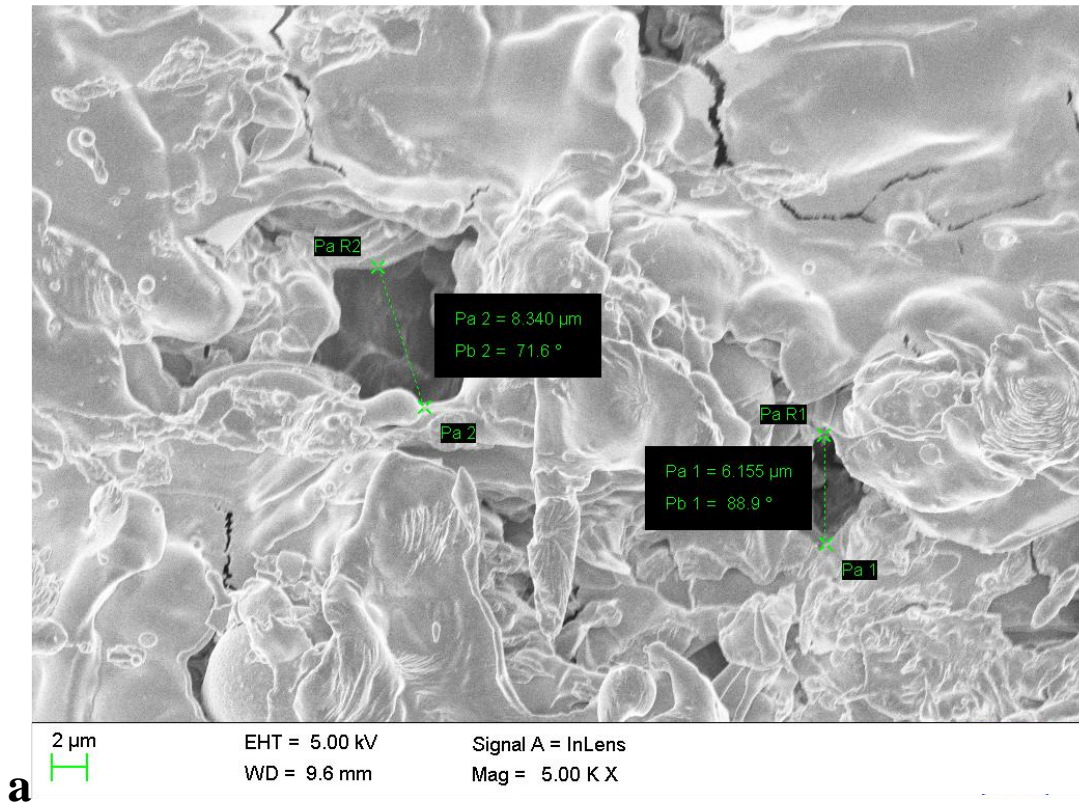

<sup>1</sup> Corresponding author

Tel.: +1 (778) 782-8538; Fax: +1 (778) 782-7514.

E-mail addresses pthimmai@sfu.ca (P. Cheppudira Thimmaiah), pradip@mecheng.iisc.ernet.in (P. Dutta), mbahrami@sfu.ca (M. Bahrami).

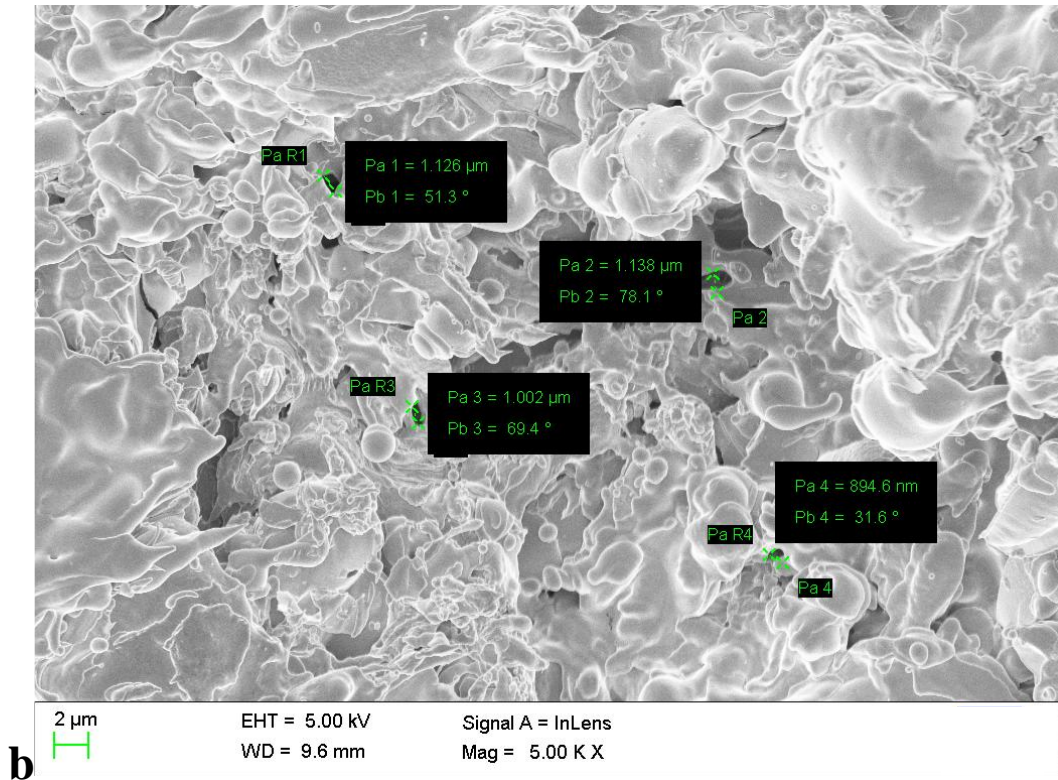

SEM images of wire flame coating at locations (a) and (b)

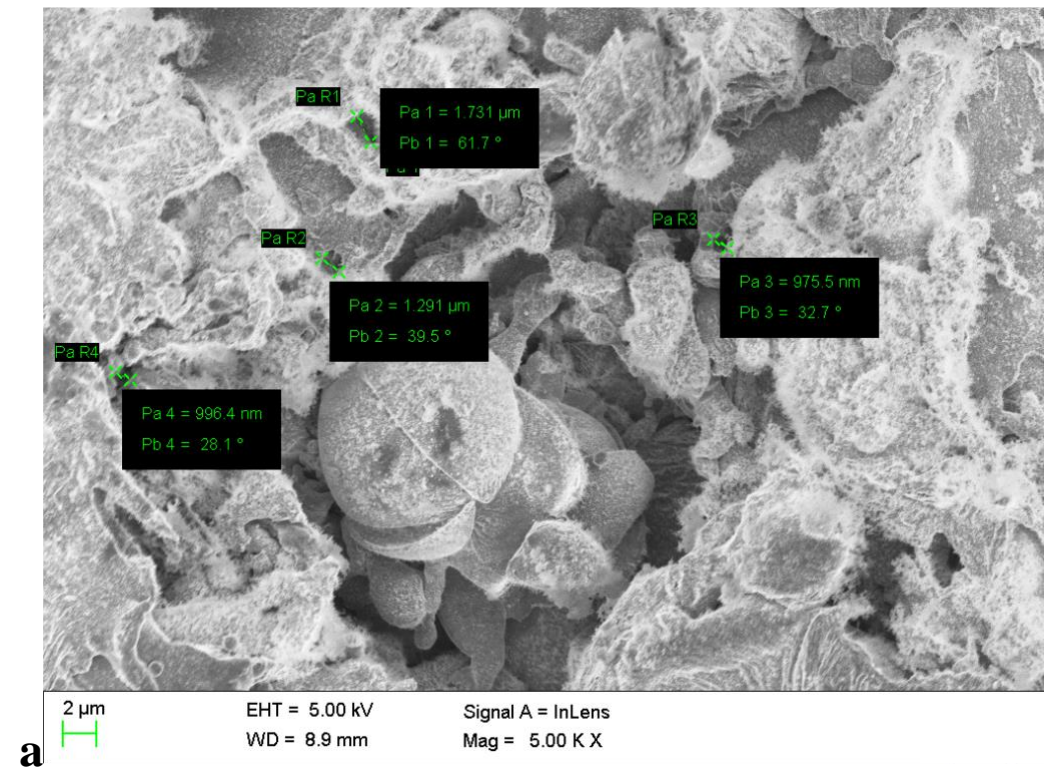

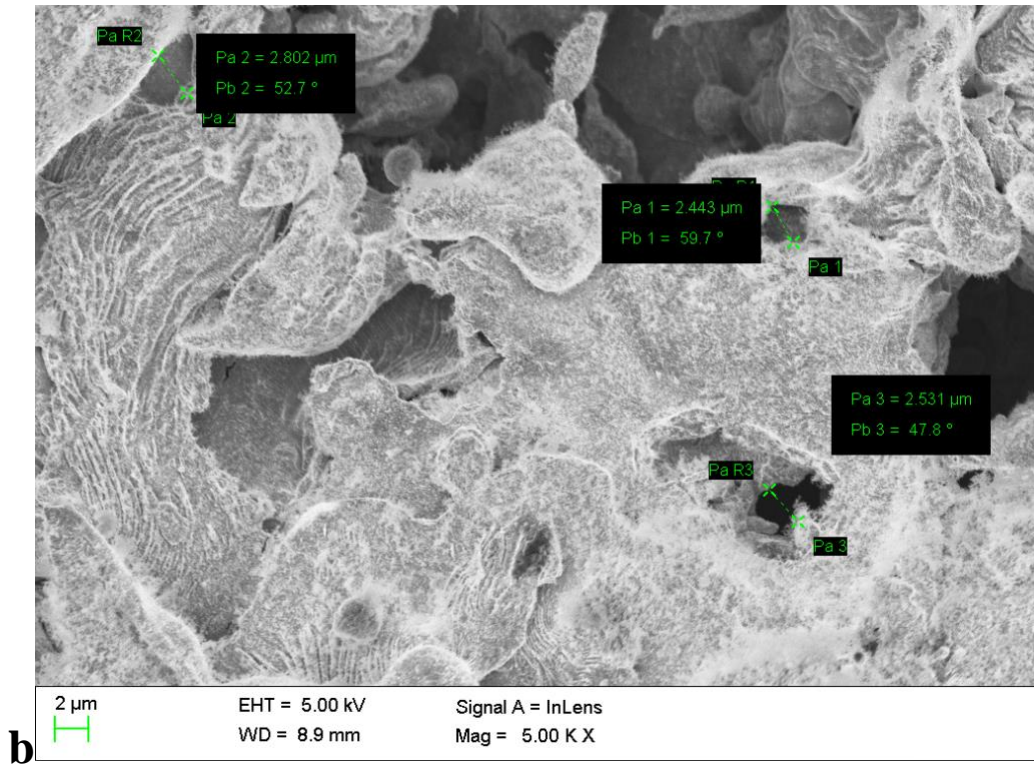

SEM images of plasma spray coating at locations (a) and (b)
